# Supplementary material
Source: PubMed Central journal article supplement (PMC4739352)
Supplement: Supp_Figure1.pdf [file Supp_Figure1.pdf]

## Supplementary Data

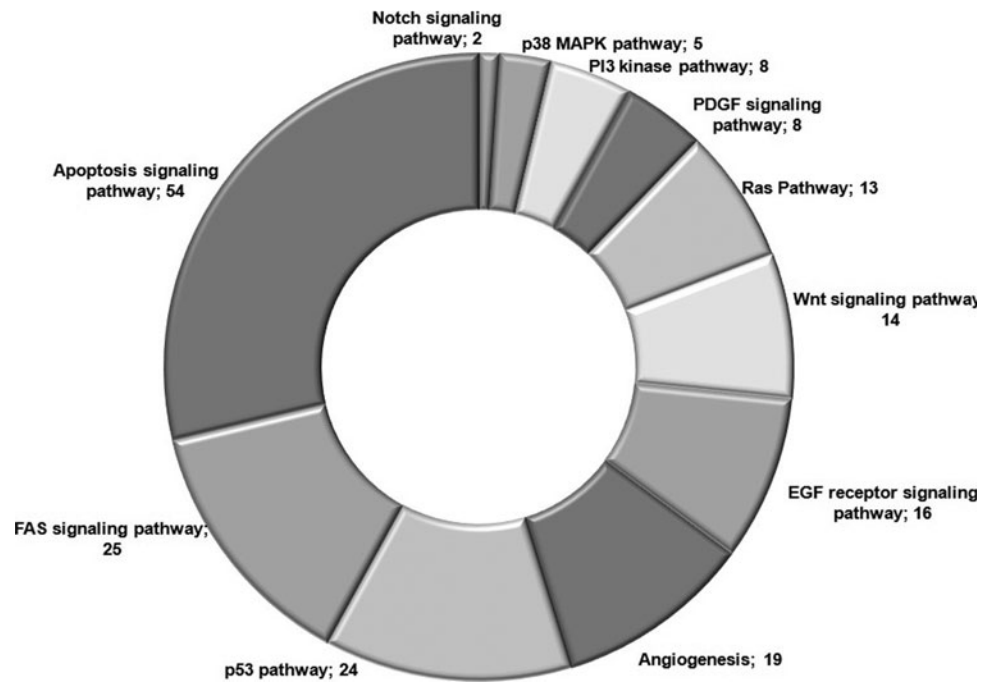

**SUPPLEMENTARY FIG. S1.** Involvement of genes in different signaling pathways using the tool PANTHER.
