# Supplementary material
Source: PubMed Central journal article supplement (PMC4739352)
Supplement: Supp_Figure2.pdf [file Supp_Figure2.pdf]

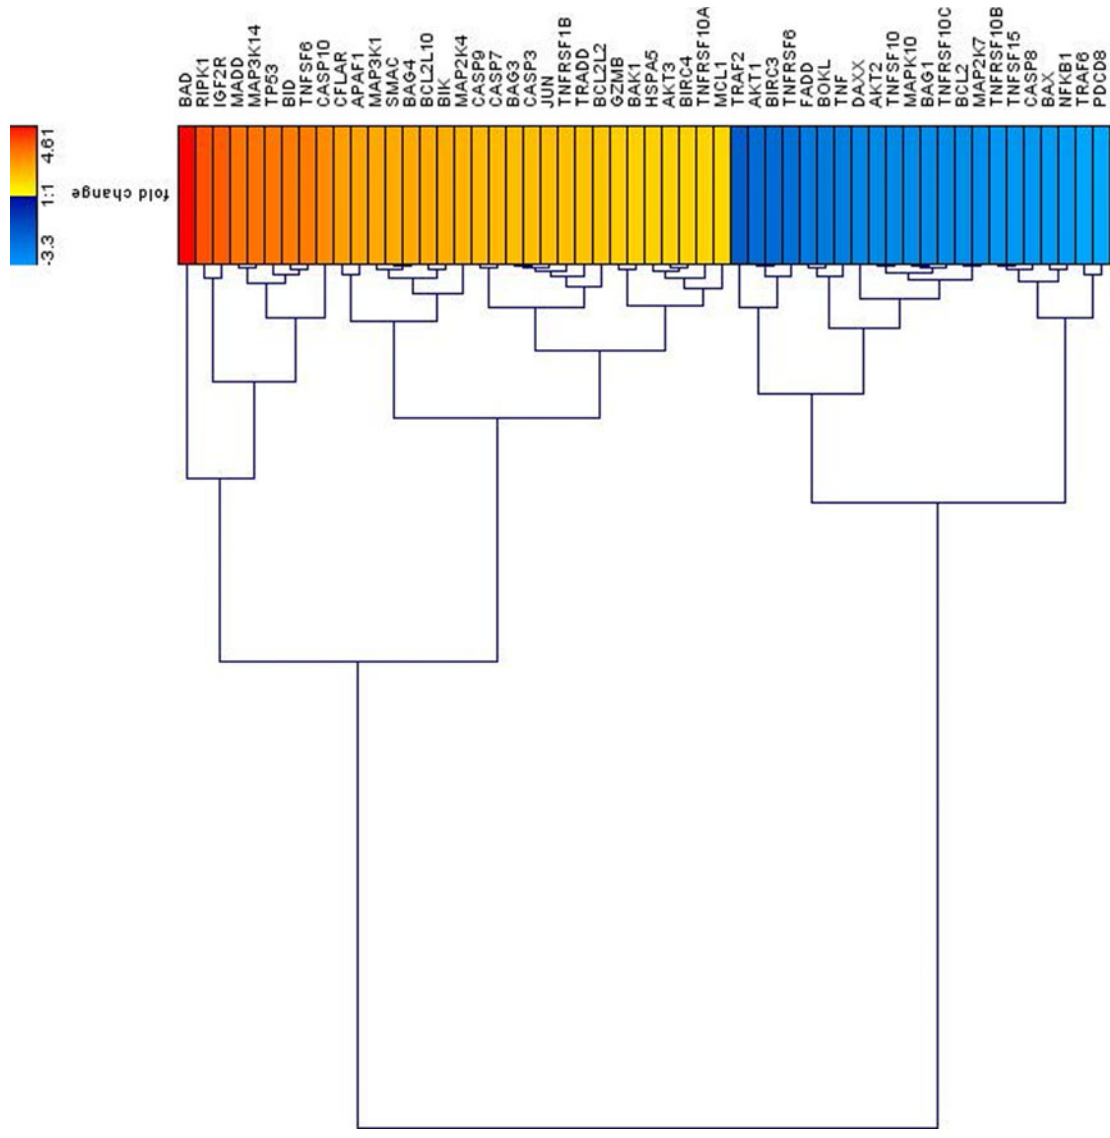

**SUPPLEMENTARY FIG. S2.** Heatmap and fold change values of PANTHER-identified apoptosis pathway related genes.
