# Supplementary material
Source: PubMed Central journal article supplement (PMC4739352)
Supplement: Supp_Figure3.pdf [file Supp_Figure3.pdf]

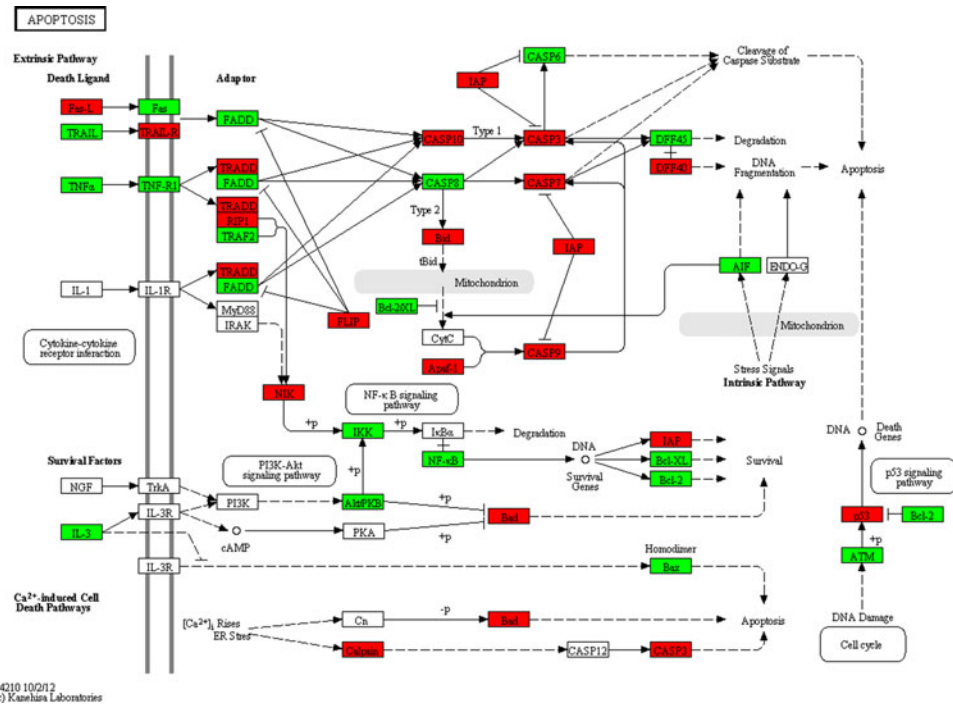

**SUPPLEMENTARY FIG. S3.** Apoptosis pathway map according to KEGG mapper. The genes were selected based on their availability in the apoptosis pathway. The *full and dotted lines* represent the known and predicted steps of apoptosis pathway present in KEGG database respectively. The *arrow* represents the direction the reaction, whereas “*l*” represent the end of the reaction.
