# Supplementary material
Source: PubMed Central journal article supplement (PMC4739352)
Supplement: Supp_Table1.pdf [file Supp_Table1.pdf]

SUPPLEMENTARY TABLE S1. PRIMERS USED FOR SEMI-QUANTITATIVE RT-PCR TO VALIDATE EXPRESSION OF GENES

| <i>NAME</i>    |   | <i>PRIMER SEQ</i>            | <i>Accession number</i> |
|----------------|---|------------------------------|-------------------------|
| <i>TNFRSF7</i> | F | GCACGGCCACATCCCT             | NM_001242               |
|                | R | TCAGGGGGAGCAGGCA             |                         |
| <i>TNFSF9</i>  | F | ATGGAATACGCCTCTGACGC         | NM_003811               |
|                | R | GGTGAAGGGAGTCCGGC            |                         |
| <i>CASP3</i>   | F | ATGGAGAACACTGAAAACCTC        | AK291337                |
|                | R | TGTGAGCATGGAAACAATAC         |                         |
| <i>CASP7</i>   | F | ATGGCAGATGATCAGGGCT          | NM_001267056            |
|                | R | CTATTGACTGAAGTAGAGTTCCTTGGTG |                         |
| <i>CASP9</i>   | F | ATGGACGAAGCGGATC             | NM_001229               |
|                | R | CCGGAGGAAATTAAGCAAC          |                         |
| <i>BID</i>     | F | ATGGACTGTGAGGTCAACAAC        | NM_197966               |
|                | R | TCAGTCCATCCCATTTCTG          |                         |
| <i>AKT1</i>    | F | ATGAGCGACGTGGCTATTGT         | XM_005267401            |
|                | R | CTGGCCGAGTAGGAGAACTG         |                         |
| <i>HSP90</i>   | F | GTTGGACAGTGGTAAAGAG          | AY359878.1              |
|                | R | ATTTCTCGGGAGATGTTTCAG        |                         |
| <i>TF3C</i>    | F | CTTTGGGAGTACTTTGTGGG         | NM_001122823.1          |
|                | R | GGAAAAGAGAGCAGGCCTC          |                         |
