# Supplementary material
Source: PubMed Central journal article supplement (PMC4739352)
Supplement: Supp_Table2.pdf [file Supp_Table2.pdf]

SUPPLEMENTARY TABLE S2. ACCESSION NUMBERS AND FOLD EXPRESSION OF GENES ANALYZED IN PRESENT INVESTIGATION

| <i>GB Acc.no.</i> | <i>Gene_Symbol</i> | <i>Fold expression</i> | <i>SD</i> | <i>Gene name</i>                                                                 |
|-------------------|--------------------|------------------------|-----------|----------------------------------------------------------------------------------|
| NM_000077         | CDKN2A             | 2.19                   | 0.45      | Cyclin-dependent kinase inhibitor 2A (melanoma, p16, inhibits CDK4)              |
| NM_001949         | E2F3               | -2.01                  | 0.05      | E2F transcription factor 3                                                       |
| NM_002157         | HSPE1              | -1.915                 | 0.105     | Heat shock 10kD protein 1 (chaperonin 10)                                        |
| NM_001244         | TNFSF8             | -1.99                  | 0.31      | Tumor necrosis factor (ligand) superfamily, member 8                             |
| NM_001243         | TNFRSF8            | -2.225                 | 0.625     | Tumor necrosis factor receptor superfamily, member 8                             |
| NM_005375         | MYB                | -2.585                 | 0.855     | V-myb myeloblastosis viral oncogene homolog (avian)                              |
| NM_001552         | IGFBP4             | -1.59                  | 0.12      | Insulin-like growth factor binding protein 4                                     |
| NM_003811         | TNFSF9             | 2.65                   | 0.07      | Tumor necrosis factor (ligand) superfamily, member 9                             |
| NM_002507         | NGFR               | 3.11                   | 1.02      | Nerve growth factor receptor (TNFR superfamily, member 16)                       |
| NM_000546         | TP53               | 3.315                  | 1.575     | Tumor protein p53 (Li-Fraumeni syndrome)                                         |
| NM_000639         | TNFSF6             | 3.235                  | 0.545     | Tumor necrosis factor (ligand) superfamily, member 6                             |
| NM_001151         | SLC25A4            | -3.51                  | 1.87      | Solute carrier family 25 member 4                                                |
| NM_005658         | TRAF1              | -2.055                 | 0.275     | TNF receptor-associated factor 1                                                 |
| NM_005041         | PRF1               | -2.41                  | 0.64      | Perforin 1 (pore forming protein)                                                |
| NM_001715         | BLK                | -3.035                 | 0.155     | B lymphoid tyrosine kinase                                                       |
| NM_001951         | E2F5               | -2.285                 | 0.735     | E2F transcription factor 5, p130-binding                                         |
| NM_033292         | CASP1              | -1.995                 | 0.125     | Caspase 1, apoptosis-related cysteine protease (interleukin 1, beta, convertase) |
| NM_001192         | TNFRSF17           | 1.455                  | 0.295     | Tumor necrosis factor receptor superfamily, member 17                            |
| NM_005186         | CAPN1              | 4.925                  | 0.275     | Calpain 1, (mu/I) large subunit                                                  |
| AL050388          | GPX4/SOD           | -1.165                 | 0.055     | Glutathione peroxidase 4/Superoxide dismutase                                    |
| NM_005354         | JUND               | 3.81                   | 0.39      | Jun D proto-oncogene                                                             |
| NM_001793         | CDH3               | 3.145                  | 0.245     | Cadherin 3, type 1, P-cadherin (placental)                                       |
| NM_000686         | AGTR2              | -3.2                   | 0.31      | Angiotensin receptor 2                                                           |
| NM_004351         | CBLB               | -2.395                 | 0.005     | Cas-Br-M (murine) ectropic retroviral transforming sequence b                    |
| NM_007318         | PSEN1              | -3.135                 | 1.115     | Presenilin 1 (Alzheimer disease 3)                                               |
| NM_001226         | CASP6              | -2.17                  | 0.69      | Caspase 6                                                                        |
| NM_002755         | MAP2K1             | -2.39                  | 0.59      | Mitogen-activated protein kinase kinase 1                                        |
| NM_005928         | MFG8               | 2.33                   | 0.01      | Milk fat globule-EGF factor 8 protein                                            |
| NM_032977         | CASP10             | 2.935                  | 0.815     | Caspase 10, apoptosis-related cysteine protease                                  |
| NM_004873         | BAG5               | 1.95                   | 0.7       | BCL2-associated athanogene 5                                                     |
| NM_005173         | ATP2A3             | 2.265                  | 0.525     | ATPase, Ca++ transporting, ubiquitous                                            |
| NM_003655         | CBX4               | 2.325                  | 0.675     | Chromobox homolog 4 (Pc class homolog, Drosophila)                               |
| NM_003012         | SFRP1              | 1.315                  | 0.165     | Secreted frizzled-related protein 1                                              |
| AF113008          | RPS20              | 2.82                   | 0.57      | Ribosomal protein S20                                                            |
| NM_004295         | TRAF4              | -2.525                 | 0.185     | TNF receptor-associated factor 4                                                 |
| NM_004760         | STK17A             | -2.175                 | 1.125     | Serine/threonine kinase 17a (apoptosis-inducing)                                 |
| NM_033339         | CASP7              | 1.895                  | 0.325     | Caspase 7, apoptosis-related cysteine protease                                   |
| NM_001425         | EMP3               | 3.115                  | 0.345     | Epithelial membrane protein 3                                                    |
| NM_014959         | TUCAN              | 3.645                  | 0.795     | Tumor up-regulated CARD-containing antagonist of caspase nine                    |
| NM_004849         | APG5L              | 1.695                  | 0.325     | APG5 autophagy 5-like (S. cerevisiae)                                            |
| NM_004469         | FIGF               | 1.535                  | 0.155     | C-fos induced growth factor (vascular endothelial growth factor D)               |
| NM_004832         | GSTTLp28           | 2.825                  | 0.205     | Glutathione-S-transferase like; glutathione transferase omega                    |
| NM_030766         | BCLG               | 3.1                    | 0.56      | Apoptosis regulator BCL-G                                                        |
| NM_003766         | BECN1              | 1.84                   | 0.09      | Beclin 1 (coiled-coil, myosin-like BCL2 interacting protein)                     |
| NM_002253         | KDR                | 2.37                   | 0.23      | Kinase insert domain receptor (a type III receptor tyrosine kinase)              |
| NM_006268         | REQ                | -3.285                 | 1.105     | Requiem, apoptosis response zinc finger gene                                     |
| NM_004281         | BAG3               | 1.795                  | 0.325     | BCL2-associated athanogene 3                                                     |
| NM_012138         | DED                | 1.12                   | 0.06      | Apoptosis antagonizing transcription factor                                      |
| NM_001707         | BCL7B              | 1.895                  | 0.155     | B-cell CLL/lymphoma 7B                                                           |
| NM_014380         | NGFRAP1            | 4.2                    | 0.07      | Nerve growth factor receptor (TNFRSF16) associated protein 1                     |

(continued)

SUPPLEMENTARY TABLE S2. (CONTINUED)

| <i>GB Acc.no.</i> | <i>Gene_Symbol</i> | <i>Fold expression</i> | <i>SD</i> | <i>Gene name</i>                                                                                |
|-------------------|--------------------|------------------------|-----------|-------------------------------------------------------------------------------------------------|
| NM_003872         | NRP2               | -2.95                  | 0.38      | Neuropilin 2                                                                                    |
| NM_014350         | GG2-1              | -2.99                  | 0.22      | TNF-induced protein                                                                             |
| NM_004208         | PDCD8              | -3.295                 | 0.745     | Programmed cell death 8 (apoptosis-inducing factor)                                             |
| NM_006286         | TFDP2              | -2.005                 | 0.105     | Transcription factor Dp-2 (E2F dimerization partner 2)                                          |
| NM_006092         | CARD4              | -2.59                  | 0.78      | Caspase recruitment domain family, member 4                                                     |
| NM_033357         | CASP8              | -2.78                  | 0.28      | Caspase 8, apoptosis-related cysteine protease                                                  |
| NM_005879         | TRIP               | -2.325                 | 0.105     | TRAF interacting protein                                                                        |
| NM_000726         | CACNB4             | -3.095                 | 0.535     | Calcium channel, voltage-dependent, beta 4 subunit                                              |
| AF376061          | CARD12             | -1.63                  | 0.39      | Caspase recruitment domain protein 12                                                           |
| NM_000720         | CACNA1D            | -1.87                  | 0.02      | Calcium channel, voltage-dependent, L type, alpha 1D subunit                                    |
| AK024029          | MAP-1              | -2.445                 | 0.005     | Modulator of apoptosis 1                                                                        |
| NM_001429         | EP300              | -2.145                 | 0.015     | E1A binding protein p300                                                                        |
| NM_001348         | DAPK3              | -3.215                 | 0.065     | Death-associated protein kinase 3                                                               |
| NM_001250         | TNFRSF5            | -2.77                  | 0.01      | Tumor necrosis factor receptor superfamily, member 5                                            |
| NM_007051         | FAF1               | -1.475                 | 0.355     | Fas (TNFRSF6) associated factor 1                                                               |
| BC002712          | MYCN               | -2.465                 | 0.035     | V-myc myelocytomatosis viral related oncogene, neuroblastoma derived (avian)                    |
| AJ252060          | TRABID             | -1.6                   | 0.26      | TRAF-binding protein domain                                                                     |
| NM_003809         | TNFSF12            | -2.645                 | 0.335     | Tumor necrosis factor (ligand) superfamily, member 12                                           |
| NM_002401         | MAP3K3             | -1.84                  | 0.25      | Mitogen-activated protein kinase kinase kinase 3                                                |
| NM_007115         | TNFAIP6            | -2.51                  | 0.54      | Tumor necrosis factor, alpha-induced protein 6                                                  |
| NM_001800         | CDKN2D             | -1.68                  | 0.09      | Cyclin-dependent kinase inhibitor 2D (p19, inhibits CDK4)                                       |
| NM_004619         | TRAF5              | -1.455                 | 0.295     | TNF receptor-associated factor 5                                                                |
| NM_005710         | PQBP1              | 1.64                   | 0.1       | Polyglutamine binding protein 1                                                                 |
| NM_002577         | PAK2               | 3.015                  | 0.175     | P21 (CDKN1A)-activated kinase 2                                                                 |
| NM_000724         | CACNB2             | -1.54                  | 0.22      | Calcium channel, voltage-dependent, beta 2 subunit                                              |
| NM_005178         | BCL3               | 2.91                   | 0.22      | B-cell CLL/lymphoma 3                                                                           |
| NM_012094         | PRDX5              | -2.34                  | 0.4       | Peroxiredoxin 5                                                                                 |
| NM_000835         | GRIN2C             | -2.17                  | 0.85      | Glutamate receptor, ionotropic, N-methyl D-aspartate 2C                                         |
| AK055180          | PDCD2              | -1.81                  | 0.67      | Programmed cell death 2                                                                         |
| NM_004323         | BAG1               | -2.415                 | 0.075     | BCL2-associated athanogene                                                                      |
| NM_003639         | IKBKG              | -2.125                 | 0.325     | Inhibitor of kappa light polypeptide gene enhancer in B-cells, kinase gamma                     |
| AK024472          | BMF                | -3.295                 | 0.115     | Bcl-2 modifying factor                                                                          |
| NM_018838         | DAP13              | 1.03                   | 0.03      | 13kDa differentiation-associated protein                                                        |
| NM_005426         | TP53BP2            | 1.88                   | 0.14      | Tumor protein p53 binding protein, 2                                                            |
| NM_005537         | ING1               | 1.285                  | 0.125     | Inhibitor of growth family, member 1                                                            |
| NM_000620         | NOS1               | 3.78                   | 0.7       | Nitric oxide synthase 1 (neuronal)                                                              |
| NM_016614         | AD022              | 3.035                  | 0.185     | TRAF and TNF receptor-associated protein                                                        |
| NM_003954         | MAP3K14            | 3.38                   | 0.08      | Mitogen-activated protein kinase kinase kinase 14                                               |
| NM_004881         | PIG3               | 2.125                  | 0.945     | Quinone oxidoreductase homolog                                                                  |
| AF016266          | TNFRSF10B          | -2.735                 | 0.475     | Tumor necrosis factor receptor superfamily, member 10b                                          |
| NM_003808         | TNFSF13            | -3                     | 0.65      | Tumor necrosis factor (ligand) superfamily, member 13                                           |
| NM_004282         | BAG2               | -2.52                  | 0.62      | BCL2-associated athanogene 2                                                                    |
| NM_021571         | ICEBERG            | -1.405                 | 0.015     | ICEBERG caspase-1 inhibitor                                                                     |
| AY028896          | CARD10             | -2.43                  | 0.37      | Caspase recruitment domain protein 10                                                           |
| NM_016335         | PRODH              | 1.7                    | 0.02      | Proline dehydrogenase (oxidase) 1                                                               |
| NM_005449         | TOSO               | 5.63                   | 0.75      | Regulator of Fas-induced apoptosis                                                              |
| NM_003718         | CDC2L5             | 2.05                   | 0.57      | Cell division cycle 2-like 5 (cholinesterase-related cell division controller)                  |
| NM_003183         | ADAM17             | 4.38                   | 0.87      | A disintegrin and metalloproteinase domain 17 (tumor necrosis factor, alpha, converting enzyme) |
| NM_003873         | NRP1               | 1.305                  | 0.045     | Neuropilin 1                                                                                    |
| NM_000718         | CACNA1B            | -2.53                  | 0.65      | Calcium channel, voltage-dependent, L type, alpha 1B subunit                                    |
| NM_005163         | AKT1               | -1.53                  | 0.24      | V-akt murine thymoma viral oncogene homolog 1                                                   |
| NM_013258         | ASC                | -2.27                  | 0.080829  | Apoptosis-associated speck-like protein containing a CARD                                       |
| NM_003551         | NME5               | -2.825                 | 0.905     | Non-metastatic cells 5, protein expressed in (nucleoside-diphosphate kinase)                    |

(continued)

SUPPLEMENTARY TABLE S2. (CONTINUED)

| <i>GB Acc.no.</i> | <i>Gene_Symbol</i> | <i>Fold expression</i> | <i>SD</i> | <i>Gene name</i>                                                                                     |
|-------------------|--------------------|------------------------|-----------|------------------------------------------------------------------------------------------------------|
| NM_005057         | RBBP5              | -2.71                  | 0.58      | Retinoblastoma binding protein 5                                                                     |
| NM_001841         | CNR2               | -1.625                 | 0.435     | Cannabinoid receptor 2 (macrophage)                                                                  |
| NM_005733         | RAB6KIFL           | 3.575                  | 0.905     | RAB6 interacting, kinesin-like (rabkinesin6)                                                         |
| AF022375          | VEGF               | -2.71                  | 0.1       | Vascular endothelial growth factor                                                                   |
| NM_001561         | TNFRSF9            | 3.62                   | 0.47      | Tumor necrosis factor receptor superfamily, member 9                                                 |
| NM_001753         | CAV1               | 2.365                  | 0.195     | Caveolin 1, caveolae protein, 22kD                                                                   |
| NM_004346         | CASP3              | 1.79                   | 0.12      | Caspase 3, apoptosis-related cysteine protease                                                       |
| NM_000038         | APC                | -1.91                  | 0.12      | Adenomatosis polyposis coli                                                                          |
| NM_025096         | FASTK              | -1.99                  | 0.18      | FAST kinase                                                                                          |
| NM_001831         | CLU                | -2.52                  | 0.64      | Clusterin (complement lysis inhibitor, SP-40,40, sulfated glycoprotein 2, testosterone-repressed pro |
| NM_016083         | CNR1               | -1.915                 | 0.025     | Cannabinoid receptor 1 (brain)                                                                       |
| NM_004394         | DAP                | -2.24                  | 0.08      | Death-associated protein                                                                             |
| NM_003010         | MAP2K4             | 2.08                   | 0.97      | Mitogen-activated protein kinase kinase 4                                                            |
| NM_004050         | BCL2L2             | 1.6                    | 0.24      | BCL2-like 2                                                                                          |
| NM_001068         | TOP2B              | 1.96                   | 0.04      | Topoisomerase (DNA) II beta (180kD)                                                                  |
| NM_005347         | HSPA5              | 1.32                   | 0.24      | Heat shock 70kD protein 5 (glucose-regulated protein, 78kD)                                          |
| NM_000454         | SOD1               | 1.955                  | 0.275     | Superoxide dismutase 1, soluble (amyotrophic lateral sclerosis 1 (adult))                            |
| NM_000321         | RB1                | 1.955                  | 0.065     | Retinoblastoma 1 (including osteosarcoma)                                                            |
| D86970            | TIAF1              | 2.565                  | 0.165     | TGFB1-induced anti-apoptotic factor 1                                                                |
| NM_021137         | TNFAIP1            | -2.17                  | 0.58      | Tumor necrosis factor, alpha-induced protein 1 (endothelial)                                         |
| NM_005056         | RBBP2              | -3.88                  | 0.7       | Retinoblastoma binding protein 2                                                                     |
| NM_004847         | AIF1               | 1.625                  | 0.495     | Allograft inflammatory factor 1                                                                      |
| AK023420          | BAD                | 4.615                  | 0.955     | BCL2-antagonist of cell death                                                                        |
| NM_000876         | IGF2R              | 3.8                    | 0.58      | Insulin-like growth factor 2 receptor                                                                |
| NM_004862         | PIG7               | 4.115                  | 0.135     | LPS-induced TNF-alpha factor                                                                         |
| NM_014330         | PPP1R15A           | 2.335                  | 0.095     | Protein phosphatase 1, regulatory (inhibitor) subunit 15A                                            |
| NM_001006         | RPS3A              | 2.125                  | 0.105     | Ribosomal protein S3A                                                                                |
| NM_003127         | SPTAN1             | -1.09                  | 0.03      | Spectrin, alpha, non-erythrocytic 1 (alpha-fodrin)                                                   |
| NM_013229         | APAF1              | 2.44                   | 0.93      | Apoptotic protease activating factor                                                                 |
| NM_005572         | LMNA               | 2.3                    | 0.6       | Lamin A/C                                                                                            |
| NM_000122         | ERCC3              | 3.75                   | 0.98      | Excision repair cross-complementing rodent repair deficiency, complementation group 3 (xeroderma pig |
| NM_002228         | JUN                | 1.775                  | 0.115     | V-jun sarcoma virus 17 oncogene homolog (avian)                                                      |
| NM_003580         | NSMAF              | 3.75                   | 0.16      | Neutral sphingomyelinase (N-SMase) activation associated factor                                      |
| NM_003377         | VEGFB              | 1.655                  | 0.045     | Vascular endothelial growth factor B                                                                 |
| NM_003375         | VDAC2              | 2.72                   | 0.35      | Voltage-dependent anion channel 2                                                                    |
| NM_004536         | BIRC1              | 3.325                  | 0.305     | Baculoviral IAP repeat-containing 1                                                                  |
| BC010112          | HSPD1              | -4.73                  | 1.83      | Heat shock 60kD protein 1 (chaperonin)                                                               |
| NM_004060         | CCNG1              | -1.955                 | 0.355     | Cyclin G1                                                                                            |
| NM_005429         | VEGFC              | -2.71                  | 0.1       | Vascular endothelial growth factor C                                                                 |
| NM_000633         | BCL2               | -2.48                  | 1.34      | B-cell CLL/lymphoma 2                                                                                |
| NM_007111         | TFDP1              | -1.985                 | 0.095     | Transcription factor Dp-1                                                                            |
| X76061            | RBL2               | -3.745                 | 0.005     | Retinoblastoma-like 2 (p130)                                                                         |
| NM_002111         | HD                 | -2.945                 | 1.085     | Huntingtin (Huntington disease)                                                                      |
| NM_004052         | BNIP3              | -3.305                 | 0.555     | BCL2/adenovirus E1B 19kD interacting protein 3                                                       |
| NM_013232         | PDCD6              | -2.66                  | 0.5       | Programmed cell death 6                                                                              |
| L24498            | GADD45A            | -2.385                 | 0.075     | Growth arrest and DNA-damage-inducible, alpha                                                        |
| NM_004899         | BRE                | -2.78                  | 0.06      | Brain and reproductive organ-expressed (TNFRSF1A modulator)                                          |
| NM_002198         | IRF1               | -2.37                  | 0.49      | Interferon regulatory factor 1                                                                       |
| NM_002513         | NME3               | -2.79                  | 0.47      | Non-metastatic cells 3, protein expressed in                                                         |
| NM_002546         | TNFRSF11B          | -3                     | 0.08      | Tumor necrosis factor receptor superfamily, member 11b (osteoprotegerin)                             |
| M90391            | IL16               | -3.32                  | 0.18      | Interleukin 16 (lymphocyte chemoattractant factor)                                                   |
| NM_001380         | DOCK1              | -2.285                 | 0.705     | Dedicator of cyto-kinesis 1                                                                          |
| NM_000043         | TNFRSF6            | -1.65                  | 0.28      | Tumor necrosis factor receptor superfamily, member 6                                                 |

(continued)

SUPPLEMENTARY TABLE S2. (CONTINUED)

| <i>GB Acc.no.</i> | <i>Gene_Symbol</i> | <i>Fold expression</i> | <i>SD</i> | <i>Gene name</i>                                                                                     |
|-------------------|--------------------|------------------------|-----------|------------------------------------------------------------------------------------------------------|
| NM_003299         | TRA1               | -2.44                  | 1.14      | Tumor rejection antigen (gp96) 1                                                                     |
| NM_001344         | DAD1               | -2.86                  | 0.12      | Defender against cell death 1                                                                        |
| NM_053056         | CCND1              | -2.065                 | 0.285     | Cyclin D1 (PRAD1: parathyroid adenomatosis 1)                                                        |
| NM_003998         | NFKB1              | -2.91                  | 0.86      | Nuclear factor of kappa light polypeptide gene enhancer in B-cells 1 (p105)                          |
| NM_003810         | TNFSF10            | -2.37                  | 0.39      | Tumor necrosis factor (ligand) superfamily, member 10                                                |
| X57025            | IGF1               | -2.065                 | 0.235     | Insulin-like growth factor 1 (somatomedin C)                                                         |
| NM_004926         | ZFP36L1            | 1.31                   | 0.11      | Zinc finger protein 36, C3H type-like 1                                                              |
| NM_003824         | FADD               | -1.555                 | 0.375     | Fas (TNFRSF6)-associated via death domain                                                            |
| BC017197          | MCL1               | 1.13                   | 0.06      | Myeloid cell leukemia sequence 1 (BCL2-related)                                                      |
| NM_001067         | TOP2A              | 1.84                   | 0.53      | Topoisomerase (DNA) II alpha (170kD)                                                                 |
| NM_004324         | BAX                | -2.875                 | 0.095     | BCL2-associated X protein                                                                            |
| NM_033657         | DAP3               | -1.23                  | 0.22      | Death associated protein 3                                                                           |
| NM_022112         | P53AIP1            | -1.495                 | 0.445     | P53-regulated apoptosis-inducing protein 1                                                           |
| NM_000721         | CACNA1E            | -1.98                  | 0.32      | Calcium channel, voltage-dependent, alpha 1E subunit                                                 |
| NM_004708         | PDCD5              | -1.775                 | 0.395     | Programmed cell death 5                                                                              |
| NM_016561         | LOC51283           | -2.235                 | 0.795     | Apoptosis regulator                                                                                  |
| NM_014289         | CAPN6              | -3.555                 | 0.565     | Calpain 6                                                                                            |
| AK001399          | SMAC               | 2.285                  | 0.035     | Second mitochondria-derived activator of caspase                                                     |
| NM_001904         | CTNNB1             | -3.07                  | 0.67      | Catenin (cadherin-associated protein), beta 1 (88kD)                                                 |
| NM_001167         | BIRC4              | 1.26                   | 0.06      | Baculoviral IAP repeat-containing 4                                                                  |
| NM_001196         | BID                | 3.265                  | 0.515     | BH3 interacting domain death agonist                                                                 |
| NM_002583         | PAWR               | 1.815                  | 0.155     | PRKC, apoptosis, WT1, regulator                                                                      |
| NM_000484         | APP                | -3.475                 | 0.105     | Amyloid beta (A4) precursor protein (protease nexin-II, Alzheimer disease)                           |
| NM_002874         | RAD23B             | -2.13                  | 0.27      | RAD23 homolog B (S. cerevisiae)                                                                      |
| NM_000389         | CDKN1A             | -2.075                 | 0.135     | Cyclin-dependent kinase inhibitor 1A (p21, Cip1)                                                     |
| NM_003790         | TNFRSF12           | -2.6                   | 0.87      | Tumor necrosis factor receptor superfamily, member 12 (translocating chain-association membrane prot |
| NM_001242         | TNFRSF7            | 2.02                   | 0.23      | Tumor necrosis factor receptor superfamily, member 7                                                 |
| NM_003326         | TNFSF4             | 1.52                   | 0.24      | Tumor necrosis factor (ligand) superfamily, member 4 (tax-transcriptionally activated glycoprotein 1 |
| AJ420488          | EEF1A1             | -1.765                 | 0.185     | Eukaryotic translation elongation factor 1 alpha 1                                                   |
| NM_022333         | TIAL1              | -2.1                   | 0.6       | TIA1 cytotoxic granule-associated RNA binding protein-like 1                                         |
| AB018263          | KIAA0720           | 1.355                  | 0.155     | KIAA0720 protein                                                                                     |
| NM_014430         | CIDEB              | 1.545                  | 0.235     | Cell death-inducing DFFA-like effector b                                                             |
| NM_052842         | BCL2L12            | -2.505                 | 0.235     | BCL2-like 12 (proline rich)                                                                          |
| NM_000177         | GSN                | -1.265                 | 0.035     | Gelsolin (amyloidosis, Finnish type)                                                                 |
| NM_032515         | BOKL               | -1.95                  | 0.39      | Bcl-2-related ovarian killer protein-like                                                            |
| NM_032415         | CARD11             | -1.25                  | 0.09      | Caspase recruitment domain family, member 11                                                         |
| NM_003031         | SIAH1              | -2.305                 | 0.115     | Seven in absentia homolog 1 (Drosophila)                                                             |
| NM_004514         | ILF1               | 4.075                  | 0.155     | Interleukin enhancer binding factor 1                                                                |
| NM_003804         | RIPK1              | 3.945                  | 0.165     | Receptor (TNFRSF)-interacting serine-threonine kinase 1                                              |
| NM_002086         | GRB2               | -3.675                 | 1.275     | Growth factor receptor-bound protein 2                                                               |
| AF110908          | TRAF3              | 1.665                  | 0.145     | TNF receptor-associated factor 3                                                                     |
| AF042838          | MAP3K1             | 2.325                  | 0.525     | Mitogen-activated protein kinase kinase kinase 1                                                     |
| NM_006185         | NUMA1              | 1.455                  | 0.035     | Nuclear mitotic apparatus protein 1                                                                  |
| NM_004347         | CASP5              | -2.355                 | 0.085     | Caspase 5, apoptosis-related cysteine protease                                                       |
| NM_033306         | CASP4              | 3.08                   | 0.88      | Caspase 4, apoptosis-related cysteine protease                                                       |
| NM_003682         | MADD               | 3.4                    | 0.61      | MAP-kinase activating death domain                                                                   |
| AF352051          | RBBP6              | 1.77                   | 0.45      | Retinoblastoma binding protein 6                                                                     |
| NM_004944         | DNASE1L3           | 2.11                   | 0.84      | Deoxyribonuclease I-like 3                                                                           |
| NM_005573         | LMNB1              | 3.265                  | 0.035     | Lamin B1                                                                                             |
| NM_033238         | PML                | -2.025                 | 0.385     | Promyelocytic leukemia                                                                               |
| NM_000586         | IL2                | 2.085                  | 0.195     | Interleukin 2                                                                                        |
| NM_003789         | TRADD              | 1.695                  | 0.085     | TNFRSF1A-associated via death domain                                                                 |
| NM_001316         | CSE1L              | 2.225                  | 0.735     | CSE1 chromosome segregation 1-like (yeast)                                                           |
| NM_006410         | HTATIP2            | 3.19                   | 0.45      | HIV-1 Tat interactive protein 2, 30 kD                                                               |
| NM_004620         | TRAF6              | -3.2                   | 0.16      | TNF receptor-associated factor 6                                                                     |
| NM_002892         | RBBP1              | 2.76                   | 0.08      | Retinoblastoma binding protein 1                                                                     |

(continued)

SUPPLEMENTARY TABLE S2. (CONTINUED)

| <i>GB Acc.no.</i> | <i>Gene_Symbol</i> | <i>Fold expression</i> | <i>SD</i> | <i>Gene name</i>                                                                                     |
|-------------------|--------------------|------------------------|-----------|------------------------------------------------------------------------------------------------------|
| NM_001188         | BAK1               | 1.375                  | 0.035     | BCL2-antagonist/killer 1                                                                             |
| NM_005225         | E2F1               | 1.885                  | 0.005     | E2F transcription factor 1                                                                           |
| U80917            | NFATC1             | 2.23                   | 0.45      | Nuclear factor of activated T-cells, cytoplasmic, calcineurin-dependent 1                            |
| AK054815          | PIG11              | -3.375                 | 0.025     | P53-induced protein                                                                                  |
| NM_001252         | TNFSF7             | 2.185                  | 0.275     | Tumor necrosis factor (ligand) superfamily, member 7                                                 |
| NM_005188         | CBL                | -1.61                  | 0.05      | Cas-Br-M (murine) ecotropic retroviral transforming sequence                                         |
| NM_000400         | ERCC2              | 3.965                  | 0.505     | Excision repair cross-complementing rodent repair deficiency, complementation group 2 (xeroderma pig |
| NM_001229         | CASP9              | 1.915                  | 0.185     | Caspase 9, apoptosis-related cysteine protease                                                       |
| NM_006291         | TNFAIP2            | 2.235                  | 0.035     | Tumor necrosis factor, alpha-induced protein 2                                                       |
| NM_002393         | MDM4               | 1.235                  | 0.205     | Mdm4, transformed 3T3 cell double minute 4, p53 binding protein (mouse)                              |
| NM_003821         | RIPK2              | 1.945                  | 0.185     | Receptor-interacting serine-threonine kinase 2                                                       |
| NM_014922         | DEFCAP             | 2.005                  | 0.005     | Death effector filament-forming Ced-4-like apoptosis protein                                         |
| BC002538          | SERPINB9           | 2.065                  | 0.865     | Serine (or cysteine) proteinase inhibitor, clade B (ovalbumin), member 9                             |
| NM_004401         | DFFA               | 2.11                   | 0.06      | DNA fragmentation factor, 45 kD, alpha polypeptide                                                   |
| NM_003128         | SPTBN1             | 2.73                   | 0.55      | Spectrin, beta, non-erythrocytic 1                                                                   |
| NM_000599         | IGFBP5             | -2.66                  | 0.82      | Insulin-like growth factor binding protein 5                                                         |
| NM_032982         | CASP2              | -2.415                 | 0.365     | Caspase 2, apoptosis-related cysteine protease (neural precursor cell expressed, developmentally dow |
| NM_004599         | SREBF2             | -2.995                 | 0.775     | Sterol regulatory element binding transcription factor 2                                             |
| NM_005043         | MAP2K7             | -2.485                 | 0.595     | Mitogen-activated protein kinase kinase 7                                                            |
| AJ298844          | DNASE1             | -2.815                 | 0.025     | Deoxyribonuclease I                                                                                  |
| NM_006615         | CAPN9              | -2.48                  | 0.6       | Calpain 9 (nCL-4)                                                                                    |
| NM_003839         | TNFRSF11A          | -2.715                 | 0.075     | Tumor necrosis factor receptor superfamily, member 11a, activator of NFkB                            |
| AK056266          | DAP10              | -2.405                 | 0.855     | DNAX-activation protein 10                                                                           |
| NM_001375         | DNASE2             | -2.49                  | 0.12      | Deoxyribonuclease II, lysosomal                                                                      |
| NM_002758         | MAP2K6             | -2.125                 | 0.135     | Mitogen-activated protein kinase kinase 6                                                            |
| NM_003764         | STX11              | -2.365                 | 0.315     | Syntaxin 11                                                                                          |
| NM_003841         | TNFRSF10C          | -2.435                 | 0.115     | Tumor necrosis factor receptor superfamily, member 10c, decoy without an intracellular domain        |
| NM_004226         | STK17B             | -2.185                 | 0.175     | Serine/threonine kinase 17b (apoptosis-inducing)                                                     |
| NM_021098         | CACNA1H            | -2.975                 | 0.035     | Calcium channel, voltage-dependent, alpha 1H subunit                                                 |
| NM_012115         | CASP8AP2           | -2.74                  | 0.32      | CASP8 associated protein 2                                                                           |
| NM_006030         | CACNA2D2           | -2.795                 | 0.545     | Calcium channel, voltage-dependent, alpha 2/delta subunit 2                                          |
| AF070674          | BIRC3              | -1.535                 | 0.345     | Baculoviral IAP repeat-containing 3                                                                  |
| NM_004920         | AATK               | -2.35                  | 0.31      | Apoptosis-associated tyrosine kinase                                                                 |
| NM_014326         | DAPK2              | -2.075                 | 0.155     | Death-associated protein kinase 2                                                                    |
| NM_003807         | TNFSF14            | -1.93                  | 0.38      | Tumor necrosis factor (ligand) superfamily, member 14                                                |
| NM_003327         | TNFRSF4            | -2.755                 | 0.545     | Tumor necrosis factor receptor superfamily, member 4                                                 |
| NM_003840         | TNFRSF10D          | -2.27                  | 1.09      | Tumor necrosis factor receptor superfamily, member 10d, decoy with truncated death domain            |
| AL132665          | BNIP3L             | -2.475                 | 0.275     | BCL2/adenovirus E1B 19kD interacting protein 3-like                                                  |
| NM_004402         | DFFB               | 1.22                   | 0.17      | DNA fragmentation factor, 40 kD, beta polypeptide (caspase-activated DNase)                          |
| NM_022162         | CARD15             | 2.795                  | 0.635     | Caspase recruitment domain family, member 15                                                         |
| NM_005183         | CACNA1F            | 3.99                   | 0.37      | Calcium channel, voltage-dependent, alpha 1F subunit                                                 |
| NM_005815         | ZK1                | -2.61                  | 0.6       | Kruppel-type zinc finger (C2H2)                                                                      |
| AF217965          | PTGES              | -2.1                   | 0.42      | Prostaglandin E synthase                                                                             |
| NM_004180         | TANK               | -2.515                 | 0.095     | TRAF family member-associated NFkB activator                                                         |
| NM_003374         | VDAC1              | -2.94                  | 0.99      | Voltage-dependent anion channel 1                                                                    |
| NM_002753         | MAPK10             | -2.41                  | 0.56      | Mitogen-activated protein kinase 10                                                                  |
| NM_015650         | MIP-T3             | -2.415                 | 0.115     | Microtubule-interacting protein that associates with TRAF3                                           |

(continued)

SUPPLEMENTARY TABLE S2. (CONTINUED)

| <i>GB Acc.no.</i> | <i>Gene_Symbol</i> | <i>Fold expression</i> | <i>SD</i> | <i>Gene name</i>                                                                             |
|-------------------|--------------------|------------------------|-----------|----------------------------------------------------------------------------------------------|
| NM_004938         | DAPK1              | -2                     | 0.43      | Death-associated protein kinase 1                                                            |
| NM_007040         | E1B-AP5            | 1.89                   | 0.48      | Tumor suppressing subtransferable candidate 3                                                |
| NM_001197         | BIK                | 2.18                   | 0.04      | BCL2-interacting killer (apoptosis-inducing)                                                 |
| NM_004330         | BNIP2              | 3.98                   | 0.34      | BCL2/adenovirus E1B 19kD interacting protein 2                                               |
| NM_003936         | CDK5R2             | 1.745                  | 0.155     | Cyclin-dependent kinase 5, regulatory subunit 2 (p39)                                        |
| BC017730          | TNFRSF21           | -2.115                 | 0.405     | Tumor necrosis factor receptor superfamily, member 21                                        |
| NM_001418         | EIF4G2             | -1.51                  | 0.06      | Eukaryotic translation initiation factor 4 gamma, 2                                          |
| NM_000993         | RPL31              | -3.9                   | 0.09      | Ribosomal protein L31                                                                        |
| NM_003921         | BCL10              | -1.49                  | 0.23      | B-cell CLL/lymphoma 10                                                                       |
| NM_000051         | ATM                | -3.055                 | 1.455     | Ataxia telangiectasia mutated (includes complementation groups A, C and D)                   |
| NM_004360         | CDH1               | 2.76                   | 0.43      | Cadherin 1, type 1, E-cadherin (epithelial)                                                  |
| NM_004874         | BAG4               | 2.275                  | 0.415     | BCL2-associated athanogene 4                                                                 |
| NM_018896         | CACNA1G            | 1.44                   | 0.04      | Calcium channel, voltage-dependent, alpha 1G subunit                                         |
| Y14039            | CFLAR              | 2.535                  | 0.045     | CASP8 and FADD-like apoptosis regulator                                                      |
| NM_021105         | PLSCR1             | -2.2                   | 0.08      | Phospholipid scramblase 1                                                                    |
| NM_002229         | JUNB               | -1.77                  | 0.25      | Jun B proto-oncogene                                                                         |
| NM_032587         | CARD6              | -1.765                 | 0.385     | Caspase recruitment domain family, member 6                                                  |
| NM_021138         | TRAF2              | -1.23                  | 0.03      | TNF receptor-associated factor 2                                                             |
| NM_000924         | PDE1B              | -1.925                 | 0.485     | Phosphodiesterase 1B, calmodulin-dependent                                                   |
| NM_006264         | PTPN13             | 2.36                   | 0.12      | Protein tyrosine phosphatase, non-receptor type 13 (APO-1/CD95 (Fas)-associated phosphatase) |
| NM_006290         | TNFAIP3            | -2.48                  | 0.44      | Tumor necrosis factor, alpha-induced protein 3                                               |
| AF090693          | CUGBP2             | 1.5                    | 0.23      | CUG triplet repeat, RNA binding protein 2                                                    |
| NM_007058         | CAPN11             | -1.41                  | 0.06      | Calpain 11                                                                                   |
| NM_006947         | SRP72              | -2.07                  | 0.93      | Signal recognition particle 72kD                                                             |
| NM_000875         | IGF1R              | -2.705                 | 0.055     | Insulin-like growth factor 1 receptor                                                        |
| NM_002039         | GAB1               | 2.645                  | 0.185     | GRB2-associated binding protein 1                                                            |
| NM_005118         | TNFSF15            | -2.74                  | 0.52      | Tumor necrosis factor (ligand) superfamily, member 15                                        |
| NM_012392         | PEF                | 2.245                  | 0.245     | PEF protein with a long N-terminal hydrophobic domain (peflin)                               |
| NM_000594         | TNF                | -2.045                 | 0.255     | Tumor necrosis factor (TNF superfamily, member 2)                                            |
| NM_005427         | TP73               | -3.68                  | 0.4       | Tumor protein p73                                                                            |
| NM_012340         | NFATC2             | 1.985                  | 0.255     | Nuclear factor of activated T-cells, cytoplasmic, calcineurin-dependent 2                    |
| NM_001510         | GRID2              | 1.855                  | 0.125     | Glutamate receptor, ionotropic, delta 2                                                      |
| NM_005092         | TNFSF18            | 1.315                  | 0.165     | Tumor necrosis factor (ligand) superfamily, member 18                                        |
| NM_012114         | CASP14             | 2.055                  | 0.005     | Caspase 14, apoptosis-related cysteine protease                                              |
| NM_001279         | CIDEA              | 2.825                  | 0.865     | Cell death-inducing DFFA-like effector a                                                     |
| NM_003844         | TNFRSF10A          | 1.22                   | 0.14      | Tumor necrosis factor receptor superfamily, member 10a                                       |
| NM_001066         | TNFRSF1B           | 1.745                  | 0.175     | Tumor necrosis factor receptor superfamily, member 1B                                        |
| NM_006871         | RIPK3              | 1.99                   | 0.08      | Receptor-interacting serine-threonine kinase 3                                               |
| NM_022352         | CARD9              | 2.32                   | 0.52      | Caspase recruitment domain family, member 9                                                  |
| NM_002178         | IGFBP6             | 1.97                   | 0.37      | Insulin-like growth factor binding protein 6                                                 |
| NM_016222         | ABS                | 2.495                  | 0.095     | DEAD-box protein abstract                                                                    |
| BC007594          | NOL3               | 1.31                   | 0.12      | Nucleolar protein 3 (apoptosis repressor with CARD domain)                                   |
| AF135794          | AKT3               | 1.29                   | 0.22      | V-akt murine thymoma viral oncogene homolog 3 (protein kinase B, gamma)                      |
| NM_003820         | TNFRSF14           | 1.42                   | 0.42      | Tumor necrosis factor receptor superfamily, member 14 (herpesvirus entry mediator)           |
| NM_020396         | BCL2L10            | 2.23                   | 0.18      | BCL2-like 10 (apoptosis facilitator)                                                         |
| NM_021631         | FKSG2              | 1.875                  | 0.035     | Apoptosis inhibitor                                                                          |
| NM_024110         | CARD14             | -2.59                  | 0.05      | Caspase recruitment domain protein 14                                                        |
| NM_006850         | IL24               | -3.43                  | 1.05      | Interleukin 24                                                                               |
| AK055779          | AKT2               | -2.365                 | 0.335     | V-akt murine thymoma viral oncogene homolog 2                                                |
| NM_000971         | RPL7               | 1.31                   | 0.02      | Ribosomal protein L7                                                                         |
| NM_000597         | IGFBP2             | 3.165                  | 0.125     | Insulin-like growth factor binding protein 2 (36kD)                                          |
| NM_004176         | SREBF1             | -2.505                 | 0.725     | Sterol regulatory element binding transcription factor 1                                     |
| NM_000714         | BZRP               | -3.12                  | 1         | Benzodiazapine receptor (peripheral)                                                         |
| NM_003286         | TOP1               | -2.75                  | 0.21      | Topoisomerase (DNA) I                                                                        |

(continued)

SUPPLEMENTARY TABLE S2. (CONTINUED)

| <i>GB Acc.no.</i> | <i>Gene_Symbol</i> | <i>Fold expression</i> | <i>SD</i> | <i>Gene name</i>                                                                |
|-------------------|--------------------|------------------------|-----------|---------------------------------------------------------------------------------|
| M92303            | CACNB1             | -3.825                 | 1.305     | Calcium channel, voltage-dependent, beta 1 subunit                              |
| NM_000074         | TNFSF5             | -2.115                 | 0.015     | Tumor necrosis factor (ligand) superfamily, member 5 (hyper-IgM syndrome)       |
| NM_000588         | IL3                | -2.5                   | 0.64      | Interleukin 3 (colony-stimulating factor, multiple)                             |
| NM_005607         | PTK2               | -2.03                  | 0.19      | PTK2 protein tyrosine kinase 2                                                  |
| NM_004970         | IGFALS             | 1.76                   | 0.59      | Insulin-like growth factor binding protein, acid labile subunit                 |
| NM_004131         | GZMB               | 1.41                   | 0.08      | Granzyme B (granzyme 2, cytotoxic T-lymphocyte-associated serine esterase 1)    |
| NM_002342         | LTBR               | 2.54                   | 0.19      | Lymphotoxin beta receptor (TNFR superfamily, member 3)                          |
| NM_016534         | LOC51275           | -2.245                 | 0.695     | Apoptosis-related protein PNAS-1                                                |
| NM_001350         | DAXX               | -2.225                 | 0.425     | Death-associated protein 6                                                      |
| NM_005793         | NM23-H6            | -1.695                 | 0.285     | Nucleoside diphosphate kinase type 6 (inhibitor of p53-induced apoptosis-alpha) |
| NM_004879         | PIG8               | -2.84                  | 0.82      | Etoposide-induced mRNA                                                          |
| NM_016434         | TNFRSF6B           | -3.35                  | 0.1       | Tumor necrosis factor receptor superfamily, member 6b, decoy                    |
| NM_002880         | RAF1               | -3.095                 | 0.195     | V-raf-1 murine leukemia viral oncogene homolog 1                                |
| NM_016553         | NUP62              | -2.635                 | 0.325     | Nucleoporin 62kD                                                                |
| NM_002046         | GAPD               | 2.935                  | 0.075     | Glyceraldehyde-3-phosphate dehydrogenase                                        |
| NM_001013         | RPS9               | -1.93                  | 0.07      | Ribosomal protein S9                                                            |
| NM_001916         | CYC1               | -3.78                  | 0.12      | Cytochrome c-1                                                                  |
