# Supplementary material
Source: PubMed Central journal article supplement (PMC4739352)
Supplement: Supp_Table3.pdf [file Supp_Table3.pdf]

SUPPLEMENTARY TABLE S3. MS-MS ANALYSIS OF DIFFERENTIAL PROTEIN

| Sl. No. | Spot No. | Control CaCo2 | Menthol-treated CaCo2                                                                                                | Protein Name        | Species    | database            | Taxonomy    | Accession No. | Protein MW | Protein pI | Protein Count For MS | Protein Score (Mascot) | Protein Score C.I. % | MS Ion Cluster Area Matched % | Peptide Count For MS/MS | Total Ion Score | Best Ion Score | Best C.I. % |
|---------|----------|---------------|----------------------------------------------------------------------------------------------------------------------|---------------------|------------|---------------------|-------------|---------------|------------|------------|----------------------|------------------------|----------------------|-------------------------------|-------------------------|-----------------|----------------|-------------|
| U8      | +        | -             | (P08238) Heat shock protein HSP 90-beta (HSP 84) (HSP 90)                                                            | <i>Homo sapiens</i> | Swiss-Prot | <i>Homo sapiens</i> | HS90B_HUMAN | 83423.18      | 4.97       | 21         | 163                  | 100                    | 21.98                |                               |                         |                 |                |             |
| U9      | +        | -             | (P26641) Elongation factor 1-gamma (EF-1-gamma) (eEF-1B gamma) (PRO1608)                                             | <i>Homo sapiens</i> | Swiss-Prot | <i>Homo sapiens</i> | EF1G_HUMAN  | 50298.23      | 6.27       | 12         | 86                   | 99.99                  | 10.42                |                               |                         |                 |                |             |
| U10     | +        | -             | (P14625) Endoplasmic precursor (94 kDa glucose-regulated protein) (GRP94) (gp96 homolog) (Tumor rejection antigen 1) | <i>Homo sapiens</i> | Swiss-Prot | <i>Homo sapiens</i> | ENPL_HUMAN  | 92696.45      | 4.76       | 16         | 110                  | 100                    | 12.83                |                               |                         |                 |                |             |
| U11     | +        | -             | (P14625) Endoplasmic precursor (94 kDa glucose-regulated protein) (GRP94) (gp96 homolog) (Tumor rejection antigen 1) | <i>Homo sapiens</i> | Swiss-Prot | <i>Homo sapiens</i> | ENPL_HUMAN  | 92696.45      | 4.76       | 21         | 163                  | 100                    | 10.15                |                               |                         |                 |                |             |
| U12     | +        | -             | (P14625) Endoplasmic precursor (94 kDa glucose-regulated protein) (GRP94) (gp96 homolog) (Tumor rejection antigen 1) | <i>Homo sapiens</i> | Swiss-Prot | <i>Homo sapiens</i> | ENPL_HUMAN  | 92696.45      | 4.76       | 25         | 207                  | 100                    | 19.52                |                               |                         |                 |                |             |
| U13     | +        | -             | (P14625) Endoplasmic precursor (94 kDa glucose-regulated protein) (GRP94) (gp96 homolog) (Tumor rejection antigen 1) | <i>Homo sapiens</i> | Swiss-Prot | <i>Homo sapiens</i> | ENPL_HUMAN  | 92696.45      | 4.76       | 18         | 124                  | 100                    | 8.25                 |                               |                         |                 |                |             |
| U14     | +        | -             | (P60709) Actin, cytoplasmic 1 (Beta-actin)                                                                           | <i>Homo sapiens</i> | Swiss-Prot | <i>Homo sapiens</i> | ACTB_HUMAN  | 42051.85      | 5.29       | 8          | 71                   | 99.89                  | 9.44                 |                               |                         |                 |                |             |
| U15     | +        | +↓            | (P78371) T-complex protein 1, beta subunit (TCP-1-beta) (CCT-beta)                                                   | <i>Homo sapiens</i> | Swiss-Prot | <i>Homo sapiens</i> | TCPB_HUMAN  | 57663.21      | 6.02       | 15         | 128                  | 100                    | 14.06                |                               |                         |                 |                |             |
| U16     | +        | +↓            | (P60709) Actin, cytoplasmic 1 (Beta-actin)                                                                           | <i>Homo sapiens</i> | Swiss-Prot | <i>Homo sapiens</i> | ACTB_HUMAN  | 42051.85      | 5.29       | 17         | 184                  | 100                    | 40.70                |                               |                         |                 |                |             |

(continued)

SUPPLEMENTARY TABLE S3. (CONTINUED)

| Sl. No. | Spot No. | Control | Menthhol- treated | CaCo2 | Protein Name                                                                                                                                                                                                                   | Species      | database   | Taxonomy     | Accession No. | Protein MW | Protein pI | Peptide Count For MS | Protein Score (Mascot) | Protein C.I. % | MS Ion Cluster Area Matched % | Peptide Count For MS/MS | Total Ion score | Best Ion Score | Best C.I. % |       |
|---------|----------|---------|-------------------|-------|--------------------------------------------------------------------------------------------------------------------------------------------------------------------------------------------------------------------------------|--------------|------------|--------------|---------------|------------|------------|----------------------|------------------------|----------------|-------------------------------|-------------------------|-----------------|----------------|-------------|-------|
| U17     | +        | +       | +                 | +     | (P60709) Actin, cytoplasmic 1 (Beta-actin)                                                                                                                                                                                     | Homo sapiens | Swiss-Prot | Homo sapiens | ACTB_HUMAN    | 42051.85   | 5.29       | 19                   | 218                    | 100            | 50.09                         |                         |                 |                |             |       |
| U18     | +        | +       | +                 | +     | (Q99497) DJ-1 protein (Oncogene DJ1)                                                                                                                                                                                           | Homo sapiens | Swiss-Prot | Homo sapiens | PARK7_HUMAN   | 20049.55   | 6.33       | 5                    | 66                     | 99.71          | 7.47                          | 1                       | 31              | 95.35          | 31          | 95.35 |
| U19     | +        | +       | +                 | +     | (P62258) 14-3-3 protein epsilon (14-3-3E)                                                                                                                                                                                      | Homo sapiens | Swiss-Prot | Homo sapiens | 1433E_HUMAN   | 29326.48   | 4.63       | 11                   | 126                    | 100            | 10.12                         | 3                       | 51              | 99.94          | 24          | 70.92 |
| U20     | +        | +       | +                 | +     | (P63104) 14-3-3 protein zeta/delta (Protein kinase C inhibitor protein-1) (KCIP-1)                                                                                                                                             | Homo sapiens | Swiss-Prot | Homo sapiens | 1433Z_HUMAN   | 27898.78   | 4.73       | 9                    | 93                     | 100            | 5.13                          | 1                       | 31              | 96.35          | 31          | 96.35 |
| U21     | -        | -       | +                 | +     | (P08758) Annexin A5 (Annexin V) (Lipocortin V) (Endonexin II) (Calphobindin I) (CBP-I) (Placental anticoagulant protein I) (PAP-I) (PP4) (Thromboplastin inhibitor) (Vascular anticoagulant-alpha) (VAC-alpha) (Anchoring CII) | Homo sapiens | Swiss-Prot | Homo sapiens | ANXA5_HUMAN   | 35840.37   | 4.94       | 13                   | 119                    | 100            | 11.86                         |                         |                 |                |             |       |
| U22     | -        | -       | +                 | +     | (P60174) Triosephosphate isomerase (EC 5.3.1.1) (TIM) (Triose-phosphate isomerase)                                                                                                                                             | Homo sapiens | Swiss-Prot | Homo sapiens | TPIS_HUMAN    | 26806.81   | 6.51       | 2                    | 53                     | 99.99          | 47                            | 2                       | 53              | 99.99          | 47          | 99.96 |
| U23     | -        | -       | +                 | +     | (P28066) Proteasome subunit alpha type 5 (EC 3.4.25.1) (Proteasome zeta chain) (Macropain zeta chain) (Multicatalytic endopeptidase complex zeta chain)                                                                        | Homo sapiens | Swiss-Prot | Homo sapiens | PSA5_HUMAN    | 26565.26   | 4.74       | 10                   | 105                    | 100            | 4.67                          | 2                       | 23              | 64.95          | 11          | 00    |
| U24     | -        | -       | +                 | +     | (Q15084) Protein disulfide-isomerase A6 precursor (EC 5.3.4.1) (Protein disulfide isomerase P5) (Thioredoxin domain containing protein 7)                                                                                      | Homo sapiens | Swiss-Prot | Homo sapiens | PDIA6_HUMAN   | 48490.41   | 4.95       | 2                    | 55                     | 96.36          | 6.35                          | 1                       | 51              | 99.96          | 51          | 99.96 |

(continued)

SUPPLEMENTARY TABLE S3. (CONTINUED)

| Sl. No. | Spot No. | Control | CaCo2 | Menthol-treated | CaCo2 | Protein Name                                                                                                                                                                                                                                                                                                                             | Species      | database   | Taxonomy     | Accession No. | Protein MW | Protein pI | Peptide Count For MS | Protein Score (Mascot) | Protein C.I. % | MS Ion Cluster Area | Matched % | Peptide Count For MS/MS | Total Ion score | Total Ion Score | Best Ion Score | Best C.I. % |
|---------|----------|---------|-------|-----------------|-------|------------------------------------------------------------------------------------------------------------------------------------------------------------------------------------------------------------------------------------------------------------------------------------------------------------------------------------------|--------------|------------|--------------|---------------|------------|------------|----------------------|------------------------|----------------|---------------------|-----------|-------------------------|-----------------|-----------------|----------------|-------------|
|         |          |         |       |                 |       |                                                                                                                                                                                                                                                                                                                                          |              |            |              |               |            |            |                      |                        |                |                     |           |                         |                 |                 |                |             |
| U25     | +        | +       | +†    |                 |       | (Q04760) Lactoylglutathione lyase (EC 4.4.1.5) (Methylglyoxalase) (Aldoketomutase) (Glyoxalase I) (Glx I) (Ketone-aldehyde mutase) (S-D-lactoylgutathione methylglyoxal lyase) (P25788) Proteasome subunit alpha type 3 (EC 3.4.25.1) (Proteasome component C8) (Macropain subunit C8) (Multicatalytic endopeptidase complex subunit C8) | Homo sapiens | Swiss-Prot | Homo sapiens | LGUL_HUMAN    | 20803.28   | 5.25       | 8                    | 116                    | 100            | 11.67               | 3         | 56                      | 99.98           | 42              | 99.55          |             |
| U26     | +        | +       | +†    |                 |       | (P25788) Proteasome subunit alpha type 3 (EC 3.4.25.1) (Proteasome component C8) (Macropain subunit C8) (Multicatalytic endopeptidase complex subunit C8)                                                                                                                                                                                | Homo sapiens | Swiss-Prot | Homo sapiens | PSA3_HUMAN    | 28512.13   | 5.19       | 10                   | 244                    | 100            | 12.94               | 7         | 174                     | 100             | 78              | 100            |             |
| U27     | +        | +       | +†    |                 |       | (Q06830) Peroxiredoxin 1 (EC 1.1.1.1.-) (Thioredoxin peroxidase 2) (Thioredoxin-dependent peroxide reductase 2) (Proliferation-associated protein PAG) (Natural killer cell enhancing factor A) (NKEF-A)                                                                                                                                 | Homo sapiens | Swiss-Prot | Homo sapiens | PRDX1_HUMAN   | 22324.35   | 8.27       | 7                    | 66                     | 99.67          | 3.52                |           |                         |                 |                 |                |             |
| U28     | +        | +       | +†    |                 |       | (P11021) 78 kDa glucose-regulated protein precursor (GRP 78) (Immunoglobulin heavy chain binding protein) (BiP) (Endoplasmic reticulum luminal Ca(2+) binding protein grp78)                                                                                                                                                             | Homo sapiens | Swiss-Prot | Homo sapiens | GRP78_HUMAN   | 72402.47   | 5.07       | 11                   | 108                    | 100            | 5.06                | 1         | 68                      | 100             | 68              | 100            |             |
| U29     | +        | +       | +†    |                 |       | (P62258) 14-3-3 protein epsilon (14-3-3E)                                                                                                                                                                                                                                                                                                | Homo sapiens | Swiss-Prot | Homo sapiens | 1433E_HUMAN   | 29326.48   | 4.63       | 12                   | 120                    | 100            | 21.89               |           |                         |                 |                 |                |             |

(continued)

SUPPLEMENTARY TABLE S3. (CONTINUED)

| Sl. No. | Spot No. | Control | Menthol-treated | CaCo2 | Protein Name                                                                                                                                                        | Species             | database   | Taxonomy            | Accession No. | Protein MW | Protein pI | Peptide Count For MS | Protein Score (Mascot) | Protein Score C.I. % | MS Ion Cluster Area Matched % | Peptide |           | Total     |       | Best Ion Score | Best C.I. % |
|---------|----------|---------|-----------------|-------|---------------------------------------------------------------------------------------------------------------------------------------------------------------------|---------------------|------------|---------------------|---------------|------------|------------|----------------------|------------------------|----------------------|-------------------------------|---------|-----------|-----------|-------|----------------|-------------|
|         |          |         |                 |       |                                                                                                                                                                     |                     |            |                     |               |            |            |                      |                        |                      |                               | Count   | For MS/MS | Ion score | Score |                |             |
| U30     | +        | +       |                 |       | (P27797) Calreticulin precursor (CRP55) (Calregulin) (HACBP) (ERp60) (grp60)                                                                                        | <i>Homo sapiens</i> | Swiss-Prot | <i>Homo sapiens</i> | CRTC_HUMAN    | 48282.89   | 4.29       | 14                   | 261                    | 100                  | 12.81                         | 5       | 149       | 100       | 53    | 99.97          |             |
| U31     | +        | +       |                 |       | (P07237) Protein disulfide-isomerase precursor (EC 5.3.4.1) (PDI) (Prolyl 4-hydroxylase beta subunit) (Cellular thyroid hormone binding protein) (p55)              | <i>Homo sapiens</i> | Swiss-Prot | <i>Homo sapiens</i> | PDIA1_HUMAN   | 57479.82   | 4.76       | 19                   | 571                    | 100                  | 32.31                         | 8       | 432       | 100       | 92    | 100            |             |
| U32     | +        | +       |                 |       | (P28838) Cytosol aminopeptidase (EC 3.4.11.1) (Leucine aminopeptidase) (LAP) (Leucyl aminopeptidase) (Proline aminopeptidase) (EC 3.4.11.5) (Prolyl aminopeptidase) | <i>Homo sapiens</i> | Swiss-Prot | <i>Homo sapiens</i> | AMPL_HUMAN    | 53005.96   | 6.29       | 10                   | 79                     | 99.98                | 6.26                          | 2       | 29        | 92.45     | 16    | 00             |             |
| U33     | +        | +       |                 |       | (Q9Y5Q8) General transcription factor 3C polypeptide 5 (Transcription factor IIIC-epsilon subunit) (TF3C-epsilon) (TFIIIC 63 kDa subunit) (TFIIIC63)                | <i>Homo sapiens</i> | Swiss-Prot | <i>Homo sapiens</i> | TF3C5_HUMAN   | 59989.26   | 6.47       | 14                   | 66                     | 99.71                | 6.27                          |         |           |           |       |                |             |
